# Supplementary material for: Effect of Eco-Friendly Application of Bee Honey Solution on Yield, Physio-Chemical, Antioxidants, and Enzyme Gene Expressions in Excessive Nitrogen-Stressed Common Bean (Phaseolus vulgaris L.) Plants
Source: MDPI journal article supplement (doi:10.3390/plants12193435), 2023-09-29
Supplement: s1 [file s1]

**Table S1.** Average weather data of the experimental location (Beni Suif District) during the two growing seasons

| Month       | Day °C | Night °C | ARH (%) | AWS (km h <sup>-1</sup> ) | AP (mm d <sup>-1</sup> ) |
|-------------|--------|----------|---------|---------------------------|--------------------------|
| 2021 season |        |          |         |                           |                          |
| September   | 34.4   | 18.1     | 52.2    | 17.0                      | 0.41                     |
| October     | 31.5   | 16.3     | 59.4    | 17.2                      | 0.45                     |
| November    | 30.0   | 14.0     | 47.9    | 17.8                      | 0.50                     |
| 2022 season |        |          |         |                           |                          |
| September   | 34.2   | 17.5     | 54.0    | 17.5                      | 0.48                     |
| October     | 31.0   | 16.6     | 59.5    | 17.5                      | 0.54                     |
| November    | 29.8   | 13.8     | 46.2    | 17.6                      | 0.60                     |

Day °C= Average day temperature, Night °C= Average night temperature, ARH= Average relative humidity, AWS= Average wind speed, and AP= Average precipitation.

**Table S2.** Physicochemical properties of the soil used in this study

| <i>Soil physical characteristics</i> |                            |             |             |            |                                   |                                           |                      |                        |             |
|--------------------------------------|----------------------------|-------------|-------------|------------|-----------------------------------|-------------------------------------------|----------------------|------------------------|-------------|
| Depth<br>(cm)                        | Particle size distribution |             |             |            | $\rho_b$<br>(g cm <sup>-3</sup> ) | K <sub>sat</sub><br>(cm h <sup>-1</sup> ) | $\theta_{Fc}$<br>(%) | $\theta_{W.P.}$<br>(%) | A.W.<br>(%) |
|                                      | Sand<br>(%)                | Silt<br>(%) | Clay<br>(%) | Texture    |                                   |                                           |                      |                        |             |
| 0-30                                 | 20.6                       | 37.8        | 41.6        | Clay loamy | 1.74                              | 2.28                                      | 28.4                 | 12.2                   | 16.4        |
| <i>Soil chemical properties</i>      |                            |             |             |            |                                   |                                           |                      |                        |             |
| pH                                   |                            |             |             | 7.68       | N (%)                             |                                           |                      | 0.06                   |             |
| ECe (dS m <sup>-1</sup> )            |                            |             |             | 2.34       | P (mg kg <sup>-1</sup> soil)      |                                           |                      | 67.8                   |             |
| CEC (cmole kg <sup>-1</sup> )        |                            |             |             | 13.4       | K (mg kg <sup>-1</sup> soil)      |                                           |                      | 486                    |             |
| CaCO <sub>3</sub> (%)                |                            |             |             | 4.68       | Fe (mg kg <sup>-1</sup> soil)     |                                           |                      | 9.84                   |             |
| OM (%)                               |                            |             |             | 1.08       | Mn (mg kg <sup>-1</sup> soil)     |                                           |                      | 6.71                   |             |
| ESP                                  |                            |             |             | 10.4       | Zn (mg kg <sup>-1</sup> soil)     |                                           |                      | 0.96                   |             |
| SAR                                  |                            |             |             | 8.62       | Cu (mg kg <sup>-1</sup> soil)     |                                           |                      | 0.67                   |             |

$\rho_b$ , Bulk density; K<sub>sat</sub>, Hydraulic conductivity;  $\theta_{Fc}$ , Volumetric water content at field capacity;  $\theta_{W.P.}$ , Volumetric water content at wilting point; A.W., Available water; OM, Organic matter; ESP, Exchangeable sodium percentage and SAR, Sodium adsorption ratio.

**Table S3.** Chemical composition of irrigation water

| Concentration of ions (meq L <sup>-1</sup> ) |                               |                               |                 |                  |                  |                |                 | EC (dS m <sup>-1</sup> ) | pH   | SAR  |
|----------------------------------------------|-------------------------------|-------------------------------|-----------------|------------------|------------------|----------------|-----------------|--------------------------|------|------|
| CO <sub>3</sub> <sup>2-</sup>                | HCO <sub>3</sub> <sup>-</sup> | SO <sub>4</sub> <sup>2-</sup> | Cl <sup>-</sup> | Mg <sup>2+</sup> | Ca <sup>2+</sup> | K <sup>+</sup> | Na <sup>+</sup> |                          |      |      |
| 0.00                                         | 2.11                          | 3.25                          | 11.7            | 1.74             | 5.40             | 1.39           | 6.13            | 1.66                     | 7.44 | 2.90 |

EC= Electrical conductivity, and SAR= Sodium adsorption ratio.

**Table S4.** Primers sequences for RT-PCR of the stress-related genes in wheat.

| The gene       | Reference Seq. | 5' - 3' primer sequence                                 | T <sub>A</sub> |
|----------------|----------------|---------------------------------------------------------|----------------|
| <i>Actin 1</i> | AB181991       | F: CTCTGACAATTTCCCGCTCA<br>R: ACACGCTTCCTCATGCTATCC     | 58 °C          |
| <i>Actin 2</i> | AT2G37620      | F: GCTATTCAAGCCGTGCTTTC<br>R: AGCATGTGGAAGGGCATAAC      |                |
| <i>SOD</i>     | MG893090.1     | F: TTCGCCATGCTGGTGATCTT<br>R: CATGGACAACCTACGGCCCTT     |                |
| <i>CAT</i>     | GU984379       | F: GGCTGCTTGAAGTTGTTCTCCT<br>R: CTGCTAGTACCTCCTGATCCGTT |                |
| <i>APX</i>     | KU747079.1     | F: TGGCCTGCTCTTCCTCTAGT<br>R: CATGCCACGCTAATCGAAGC      |                |
| <i>GR</i>      | KX828561.1     | F: CAACGCGCTTTGGTAACTCC<br>R: GGGCCCTAATGAAGTGGAGG      |                |
